# Supplementary material for: A Fine Line between Phytotoxicity and Blue When Producing Hydrangea macrophylla in a Nursery at a Low Substrate pH
Source: MDPI journal article supplement (doi:10.3390/horticulturae8080690), 2022-07-30
Supplement: s1 [file s1]

Archive with 2 entries (2 files):
- Supplemental Figure S1.pdf
- Supplemental Table S1.xlsx
