# Supplementary material for: A Fine Line between Phytotoxicity and Blue When Producing Hydrangea macrophylla in a Nursery at a Low Substrate pH
Source: MDPI journal article supplement (doi:10.3390/horticulturae8080690), 2022-07-30
Supplement: s1 [file s1 › Supplemental Figure S1.pdf]

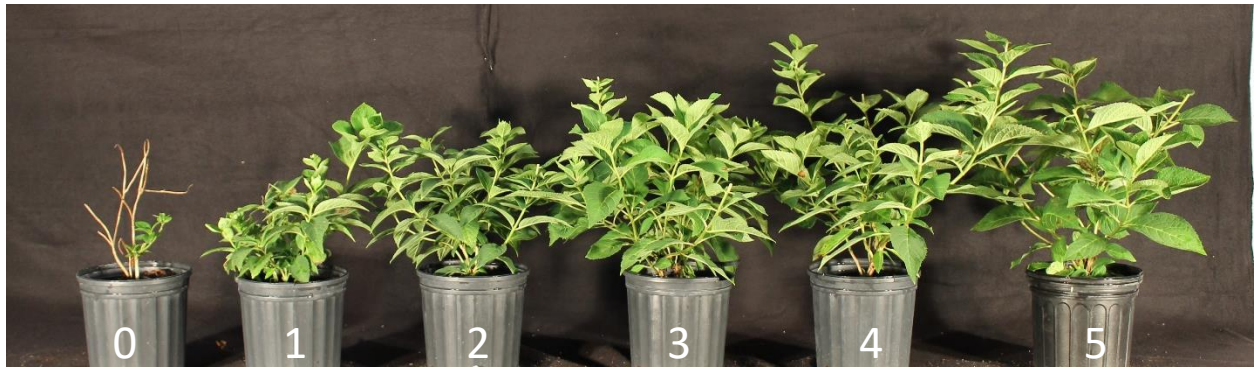

**Supplemental Figure S1.** Quality ratings of *H. macrophylla* 'Bailmer' PP15,298 Endless Summer®

Original subjected to nine aluminum treatments in two physiographic locations, Coastal Virginia Flats (CVF) and Tennessee Appalachian Highlands (TAH), for bluing the initial year of production. The nine treatments were untreated control (CO), bi-weekly drench (CD) of  $\text{Al}_2(\text{SO}_4)_3$ , incorporation of low (FSL) or high (FSH) rate of 90-day controlled release  $\text{Al}_2(\text{SO}_4)_3$  or low (ASL) or high rate (ASH) of ground, water soluble  $\text{Al}_2(\text{SO}_4)_3$ . Rescue treatments included a one-time drench (RD) of  $\text{Al}_2(\text{SO}_4)_3$  or 90-day controlled release (FST) or ground  $\text{Al}_2(\text{SO}_4)_3$  (AST) being topdressed at time of bud development. Plant quality was rated on a scale of 0-5 with 0 = the plant is entirely dead with little or no green visible (far left); 1 = smallest plant with necrosis and/or off color (chlorotic or purple) leaves; 2 = medium sized plant with short internodal distance, may have necrosis and/or off color (chlorotic or purple) leaves; 3 = medium size plant with longer internodal distance, may have minimal necrosis, some chlorosis, not uniform (asymmetric); 4 = larger size plant with new growth and some vigor, no necrosis, some chlorosis, more symmetrical canopy than 3; 5 = largest size plant showing signs of vigor/active growth, no necrosis, some chlorosis possible, symmetrical canopy (far right).
