# Supplementary material for: A Fine Line between Phytotoxicity and Blue When Producing Hydrangea macrophylla in a Nursery at a Low Substrate pH
Source: MDPI journal article supplement (doi:10.3390/horticulturae8080690), 2022-07-30
Supplement: s1 [file s1 › Supplemental Table S1.xlsx]

## Sheet: Sheet1
Table S1: Bi-weekly substrate solution pH and EC measurements for H. macrophylla ‘Bailmer’ PP15298 Endless Summer® Original subjected to nine aluminum treatments in two locations in year 1
		pH											EC
		CON	CD	FSL	FSH	ASL	ASH	RD	FST	AST	p-value		CON	CD	FSL	FSH	ASL	ASH	RD	FST	AST	p-value
CVF	3	4.15 ab	3.99 b	3.48 c	3.31 c	3.49 c	3.32 c	4.20 ab	4.33 a	4.23 ab	<0.0001	3	0.29 b	0.35 b	0.50 ab	0.82 ab	0.51 ab	0.97 a	0.29 b	0.29 b	0.28 b	0.001
	5	4.23 a	3.48 bc	3.46 bc	3.33 c	3.54 b	3.54 b	4.27 a	4.27 a	4.22 a	<0.001	5	0.24 c	0.69 a	0.50 ab	0.68 a	0.39 bc	0.40 bc	0.28 bc	0.25 c	0.25 c	<0.0001
	7	3.96 a	3.26 c	3.42 bc	3.35 bc	3.49 b	3.44 bc	4.10 a	4.15 a	4.17 a	<0.0001	7	0.39 b	1.16 a	0.61 b	0.72 b	0.52 b	0.54 b	0.39 b	0.40 b	0.40 b	<0.0001
	9	4.14 a	3.43 b	3.66 b	3.60 bc	3.69 b	3.64 b	4.35 a	4.35 a	4.33 a	<0.0001	9	0.24 cd	0.61 a	0.35 bc	0.40 b	0.31 bcd	0.29 bcd	0.23 cd	0.27 bcd	0.17 d	<0.0001
	11	4.11 a	3.41 cd	3.62 b	3.51 bc	3.65 b	3.57 bc	3.32 d	3.25 de	3.09 e	<0.0001	11	0.36 c	0.94 c	0.47 c	0.59 c	0.43 c	0.42 c	1.34 bc	2.26 ab	3.21 a	<0.0001
	13	4.38 a	3.59 c	3.87 bc	3.78 bc	3.90 b	3.82 bc	3.72 bc	3.58 c	3.58 c	<0.0001	13	0.17 b	0.32 ab	0.26 ab	0.31 ab	0.24 ab	0.24 ab	0.41 ab	0.61 a	0.38 ab	0.0398
	15	4.24 a	3.31 e	3.78 bc	3.79 bc	3.90 b	3.80 bc	4.02 ab	3.60 cd	3.49 de	<0.0001	15	0.21 c	0.63 a	0.24 c	0.23 c	0.24 c	0.25 bc	0.25 ab	0.36 bc	0.48 ab	<0.0001
	17	4.39 a	3.52 c	3.87 b	3.80 b	3.87 b	3.82 b	3.85 b	3.72 bc	3.71 bc	<0.0001	17	0.16 b	0.30 a	0.17 b	0.19 b	0.16 b	0.16 b	0.18 b	0.23 ab	0.23 ab	0.0002
		CON	CD	FSL	FSH	ASL	ASH	RD	FST	AST			CON	CD	FSL	FSH	ASL	ASH	RD	FST	AST
TAH	3	4.16 a	4.00 a	3.48 b	3.24 b	3.46 b	3.44 b	4.40 a	4.40 a	4.20 a	<0.0001	3	0.36 c	0.52 bc	0.78 abc	1.06 a	0.62 abc	0.92 ab	0.52 bc	0.30 c	0.32 c	<0.0001
	5	4.42 a	3.50 b	3.48 b	3.28 b	3.56 b	3.54 b	4.22 a	4.26 a	4.42 a	<0.0001	5	0.44 cd	0.92 a	0.76 ab	0.96 a	0.62 bcd	0.64 bc	0.38 cd	0.36 d	0.40 cd	<0.0001
	7	4.68 a	3.56 b	3.68 b	3.66 b	3.88 b	3.80 b	4.58 a	4.80 a	4.62 a	<0.0001	7	0.31 d	0.82 a	0.57 bc	0.58 b	0.49 bcd	0.52 bcd	0.30 d	0.34 cd	0.42 bcd	<0.0001
	9	4.48 ab	3.36 d	3.58 bcd	3.5 cd	3.70 bcd	3.78 bcd	4.32 abc	4.47 ab	5.16 a	<0.0001	9	0.28 b	0.64 a	0.50 ab	0.40 ab	0.40 ab	0.33 b	0.36 ab	0.25 b	0.23 b	0.0007
	11	5.14 a	3.32 de	3.78 bc	3.72 bcd	4.06 b	3.84 bc	3.50 cde	3.52 cd	3.08 e	<0.0001	11	0.16 c	0.55 c	0.23 c	0.29 c	0.17 c	0.30 c	0.71 c	1.24 ab	1.69 a	<0.0001
	13	5.28 a	3.28 c	3.98 b	3.98 b	3.96 b	3.98 b	3.96 b	3.82 bc	3.70 bc	<0.0001	13	0.15 b	0.50 a	0.15 b	0.13 b	0.14 b	0.12 b	0.17 b	0.39 ab	0.27 ab	0.0015
	15	5.16 a	3.36 c	4.00 b	3.94 b	4.14 b	3.96 b	4.06 b	3.98 b	3.74 bc	<0.0001	15	0.10 c	0.41 a	0.12 c	0.14 bc	0.12 c	0.12 c	0.13 c	0.20 bc	0.30 ab	<0.0001
	17	4.74 a	3.26 d	4.04 bc	4.04 bc	4.12 b	4.04 bc	4.14 b	4.12 b	3.76 c	<0.0001	17	0.14 b	0.48 a	0.11 b	0.11 b	0.15 b	0.10 b	0.13 b	0.12 b	0.22 b	<0.0001
